# Supplementary material for: Constructing an Al2O3/(NH4)2V4O9 heterostructure as a cathode material for high performance aqueous rechargeable zinc ion batteries
Source: Royal Society of Chemistry journal article supplement (doi:10.1039/d2ce01178f), 2022-01-01
Supplement: d2ce01178f1.pdf [file d2ce01178f1.pdf]

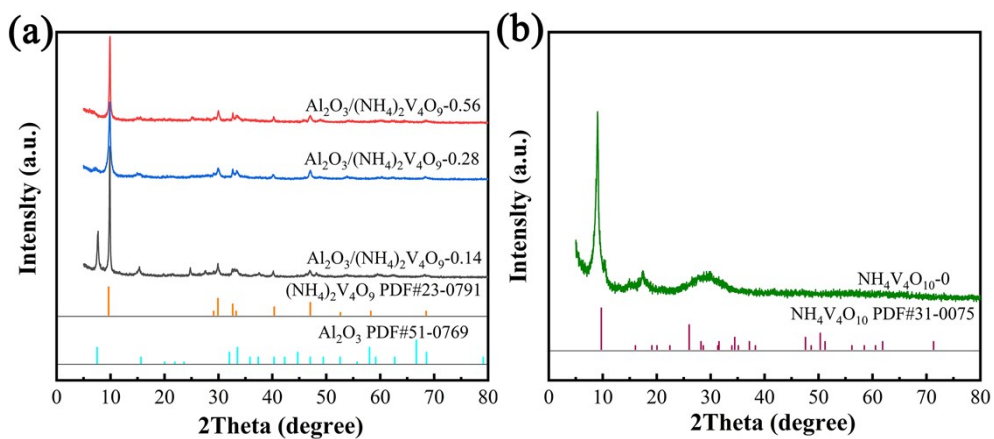

**Fig. S1.** XRD pattern of AlO-NVO samples obtained by adjusting the ratio of Al to V (a) and  $\text{NH}_4\text{V}_4\text{O}_{10-0}$  (b).

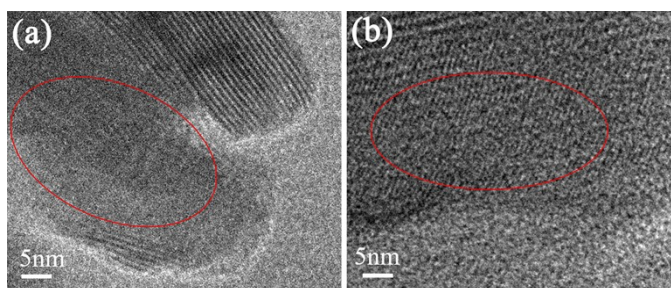

**Fig. S2.** HRTEM images of AlO-NVO-0.28.

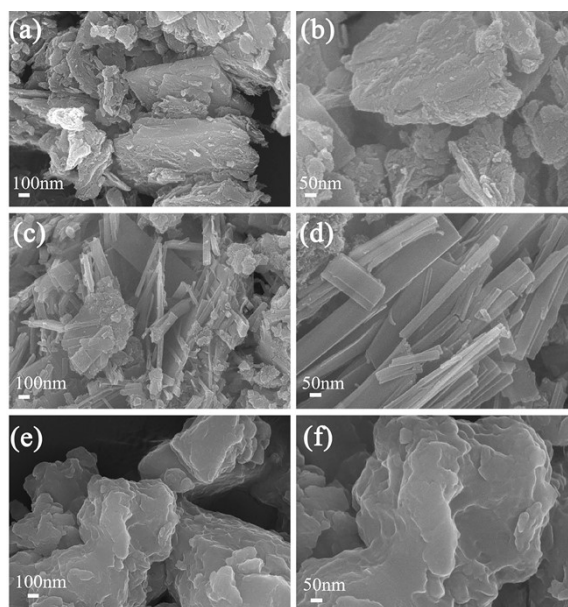

**Fig. S3.** The SEM images of AlO-NVO-0.56 (a-b), AlO-NVO-0.14 (c-d), and  $\text{NH}_4\text{V}_4\text{O}_{10-0}$  (e-f).

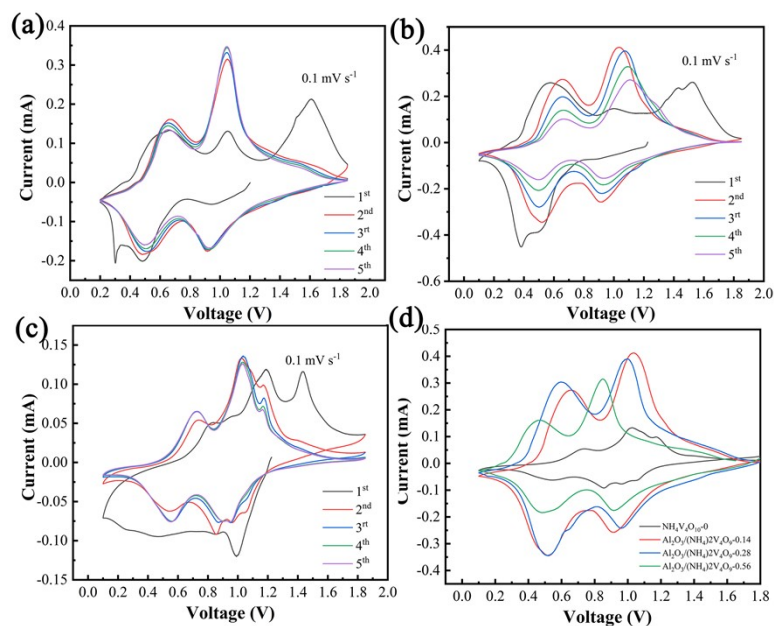

**Fig. S4.** The first five CV curves at the scan rate of  $0.1 \text{ mV s}^{-1}$  (a-c), the second and third CV curves (d) of AlO-NVO.0.28, AlO-NVO-0.14, AlO-NVO-0.56 and  $\text{NH}_4\text{V}_4\text{O}_{10}\text{-0}$ .

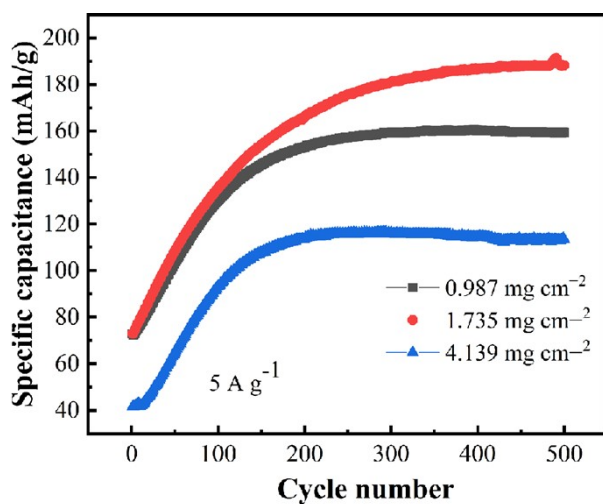

**Fig. S5.** The long-term cycling performance at the current density at  $5.0 \text{ A g}^{-1}$  of the AlO-NVO-0.28 with different load.

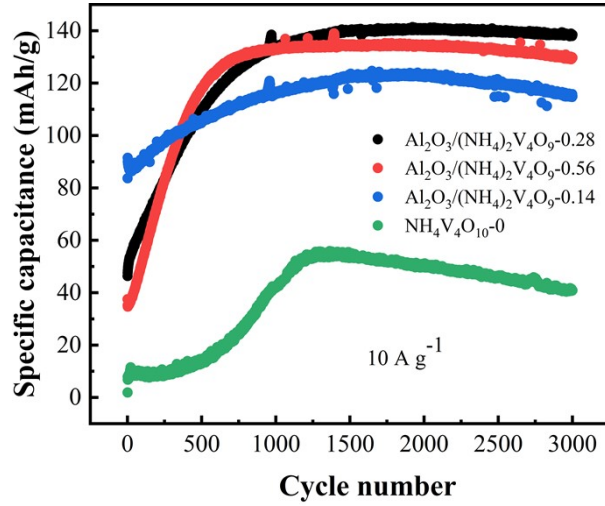

**Fig. S6.** The corresponding long-term cycling performance at the current density at  $10.0 \text{ A g}^{-1}$  of the AlO-NVO-0.28, AlO-NVO-0.14, AlO-NVO-0.56 and  $\text{NH}_4\text{V}_4\text{O}_{10-0}$ .

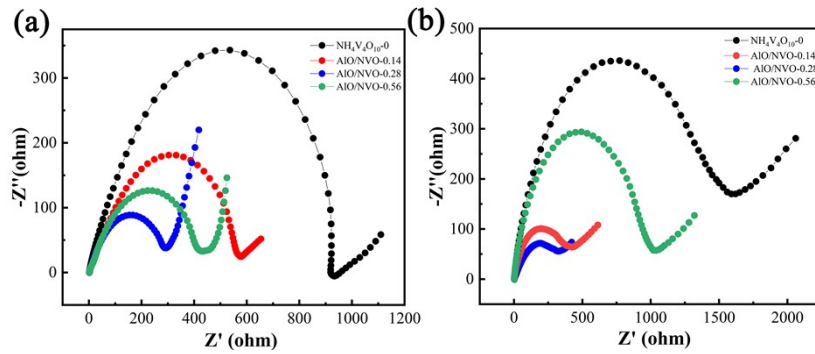

**Fig. S7.** Electrochemical impedance spectroscopy (EIS) patterns (a) initial state and (b) after 10 cycles of the four samples prepared by adjusting the amount of Al.

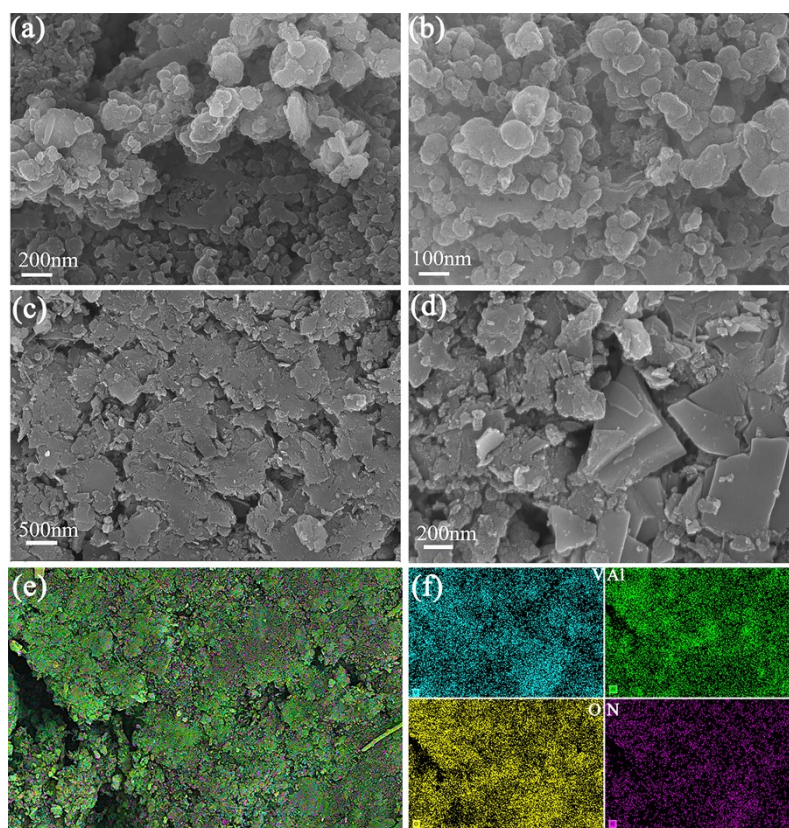

**Fig. S8.** The SEM images of the AlO-NVO-0.28 electrode after the 5 cycles (a-b), and their SEM images (c-d) EDS elemental mapping images (e-f) of the AlO/NVO-0.28 electrodes after the 500 cycles.

Table S1. Elemental analysis of Al and V in three AlO-NVO samples.

| Sample name  | Al: V(Actual dosage) | Al: V(ICP) | Al <sub>2</sub> O <sub>3</sub> proportion |
|--------------|----------------------|------------|-------------------------------------------|
| AlO-NVO-0.56 | 0.56:1               | 0.52:1     | 21.49%                                    |
| AlO-NVO-0.28 | 0.28:1               | 0.36:1     | 15.98%                                    |
| AlO-NVO-0.14 | 0.14:1               | 0.16:1     | 8.01%                                     |

Table S2. Comparison of electrochemical properties of AlO-NVO with previously reported V-based cathode materials.

| Materials                                                                                     | High discharge capacity                    | Capacity retention |
|-----------------------------------------------------------------------------------------------|--------------------------------------------|--------------------|
| Al <sub>2</sub> O <sub>3</sub> /(NH <sub>4</sub> ) <sub>2</sub> V <sub>4</sub> O <sub>9</sub> | 269 and 200 mAh g <sup>-1</sup> at 0.5 and | 86.5% after 3000   |

|                                                                                                                                                                                              |                                                                                      |                                                  |
|----------------------------------------------------------------------------------------------------------------------------------------------------------------------------------------------|--------------------------------------------------------------------------------------|--------------------------------------------------|
| (this work)                                                                                                                                                                                  | 5.0 A g <sup>-1</sup> , respectively                                                 | cycles at 5.0 A g <sup>-1</sup>                  |
| (NH <sub>4</sub> ) <sub>2</sub> V <sub>6</sub> O <sub>16</sub> ·1.5H <sub>2</sub> O [1]                                                                                                      | 284.6 and 172 mAh g <sup>-1</sup> at 3.0 and 5.0 A g <sup>-1</sup> , respectively    | 100% after 3000 cycles at 5.0 A g <sup>-1</sup>  |
| (NH <sub>4</sub> ) <sub>x</sub> V <sub>2</sub> O <sub>5</sub> ·nH <sub>2</sub> O [2]                                                                                                         | 372 and 219 mAh g <sup>-1</sup> at 0.1 and 5.0 A g <sup>-1</sup> , respectively      | 80% after 2000 cycles at 5.0 A g <sup>-1</sup>   |
| (NH <sub>4</sub> ) <sub>2</sub> V <sub>4</sub> O <sub>9</sub> ·0.5H <sub>2</sub> O [3]                                                                                                       | 200 and 177 mAh g <sup>-1</sup> at 0.5 and 5.0 A g <sup>-1</sup> , respectively      | 93% after 1000 cycles at 1.0 A g <sup>-1</sup>   |
| NH <sub>4</sub> V <sub>4</sub> O <sub>10</sub> [4]                                                                                                                                           | 355 and 280 mAh g <sup>-1</sup> at 0.3 and 2.0 A g <sup>-1</sup> , respectively      | 72% after 500 cycles at 3.0 A g <sup>-1</sup>    |
| V <sub>2</sub> O <sub>5</sub> [5]                                                                                                                                                            | 240 and 190 mAh g <sup>-1</sup> at 0.029 and 0.147 mA g <sup>-1</sup> , respectively | 97% after 100 cycles at 0.15 A g <sup>-1</sup>   |
| VS <sub>4</sub> /CNTs [6]                                                                                                                                                                    | 265 and 182 mAh g <sup>-1</sup> at 0.25 and 7 mA g <sup>-1</sup> , respectively      | 93% after 1200 cycles at 5 A g <sup>-1</sup>     |
| (NH <sub>4</sub> ) <sub>2</sub> Co <sub>2</sub> V <sub>10</sub> O <sub>28</sub> ·16H <sub>2</sub> O / (NH <sub>4</sub> ) <sub>2</sub> V <sub>10</sub> O <sub>25</sub> ·8H <sub>2</sub> O [7] | 367.7 and 238.7 mAh g <sup>-1</sup> at 0.1 and 1.0 mA g <sup>-1</sup> , respectively | 82.1% after 1000 cycles at 1.0 A g <sup>-1</sup> |
| NH <sub>4</sub> V <sub>3</sub> O <sub>8</sub> / Zn <sub>3</sub> (OH) <sub>2</sub> V <sub>2</sub> O <sub>7</sub> ·2H <sub>2</sub> O [8]                                                       | 332 and 132.6 mAh g <sup>-1</sup> at 0.1 and 0.147 mA g <sup>-1</sup> , respectively | 92% after 1000 cycles at 10.0 A g <sup>-1</sup>  |

### Reference:

- [1] X. Wang, B. Xi, Z. Feng, W. Chen, H. Li, Y. Jia, J. Feng, Y. Qian, S. Xiong, *J. Mater. Chem. A*, 2019, **7**, 19130–19139.
- [2] L. Xu, Y. Zhang, J. Zheng, H. Jiang, T. Hu, C. Meng, *Mater. Today Energy*, 2020, **18**, 100509.
- [3] R. Wei, X. Wang, B. Xi, Z. Feng, H. Li, W. Chen, Y. Jia, J. Feng, S. Xiong, *ACS Appl. Energy Mater.*, 2020, **3**, 5343–5352.
- [4] Y. Zheng, C. Tian, Y. Wu, L. Li, Y. Tao, L. Liang, G. Yu, J. Sun, S. Wu, F. Wang, Y. Pang, Z. Shen, Z. Pan, H. Chen, J. Wang, *Energy Storage Mater.*, 2022, **52**, 664–674

- [5] D. Batyrbekuly, B. Laïk, J.-P. Pereira-Ramos, Z. Bakenov, R. Baddour-Hadjean, *J. Energy Chem.*, 2021, **61**, 459–468.
- [6] S. Gao, P. Ju, Z. Liu, L. Zhai, W. Liu, X. Zhang, Y. Zhou, C. Dong, F. Jiang, J. Sun, *J. Energy Chem.*, 2022, **69**, 356–362.
- [7] W. Deng, Y. Xu, X. Zhang, C. Li, Y. Liu, K. Xiang, H. Chen, *J. Alloys Compd.*, 2022, **903**, 163824.
- [8] L. Liu , Z. Lin , Q. Shi, J. Tang , Z. Li , Z. Tao , W. Huang, *Electrochem. Comm.*, 2022, **140**, 107331.
